# Supplementary material for: Two hexa-TM-containing (TM = Co2+ and Ni2+) {P2W12}-based trimeric tungstophosphates
Source: Royal Society of Chemistry journal article supplement (doi:10.1039/b921261b), 2010-01-01
Supplement: b921261b.pdf [file b921261b.pdf]

## Two Hexa-TM-Containing (TM = $\text{Co}^{2+}$ and $\text{Ni}^{2+}$ ) $\{\text{P}_2\text{W}_{12}\}$ -Based Trimeric Tungstophosphates

Shuang Yao,<sup>a</sup> Zhiming Zhang,<sup>a</sup> Yangguang Li,<sup>a</sup> and Enbo Wang<sup>\*a</sup>

<sup>a</sup>Key laboratory of Polyoxometalate Science of Ministry of Education, Department of Chemistry, Northeast Normal University, Renmin Street No.5268, Changchun, Jinlin, 130024, P. R. China.

\*E-mail: wangeb889@nenu.edu.cn (E. B. Wang).

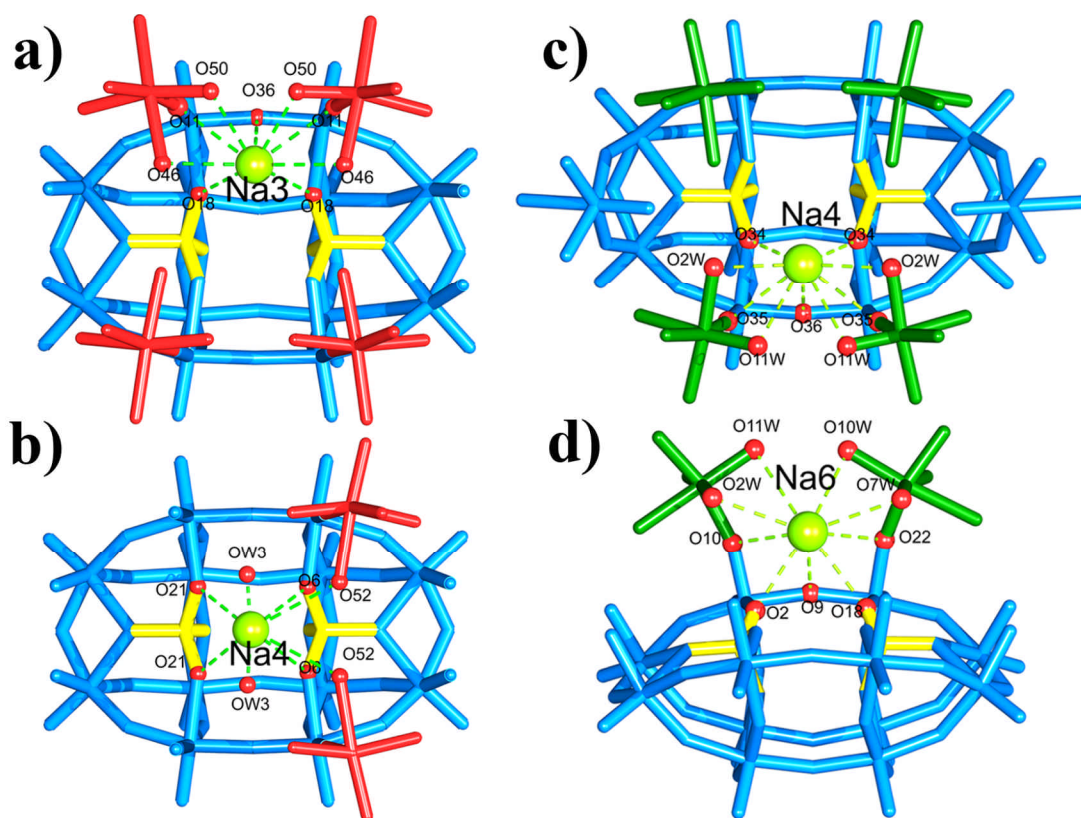

**Figure S1.** The ball-and-stick representations of the coordination modes of three Na<sup>+</sup> cations sealed in polyoxoanions **1** a) and b); **2** c) and d)

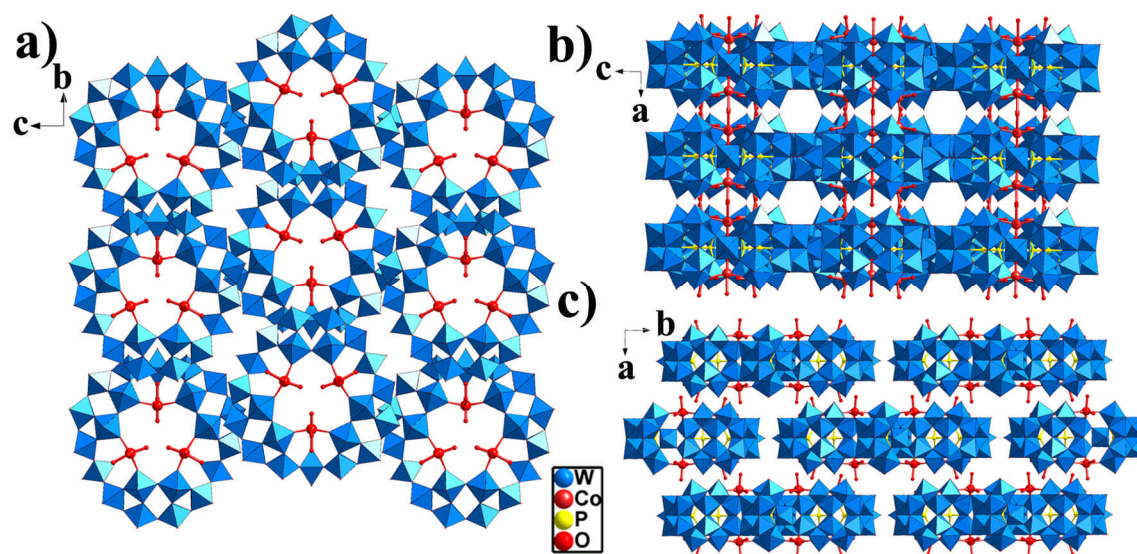

**Figure S2.** Polyhedral representation of the packing arrangements of **1** viewed along different directions.  $\text{Na}^+$  and the lattice  $\text{H}_2\text{O}$  molecules are omitted for clarity.

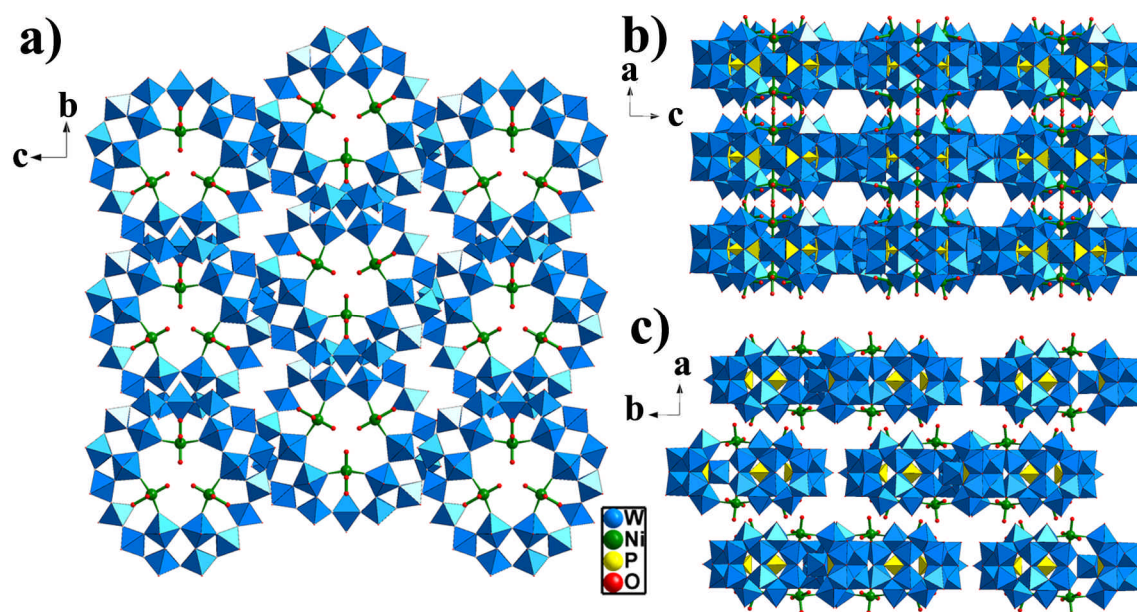

**Figure S3.** Polyhedral representation of the packing arrangements of **2** viewed along different directions.  $\text{Na}^+$  and the lattice  $\text{H}_2\text{O}$  molecules are omitted for clarity.

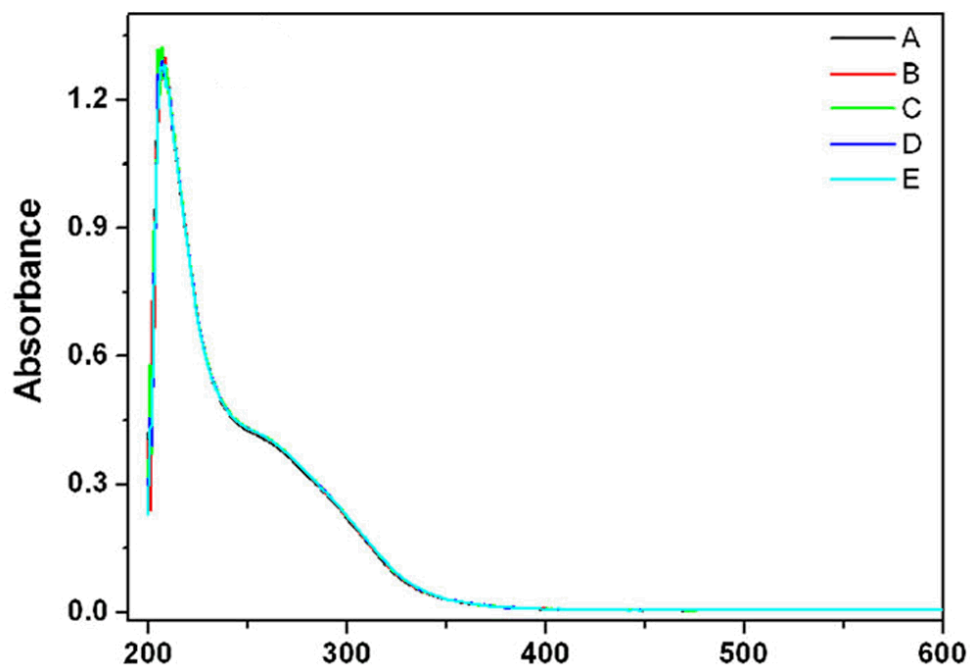

**Figure S4.** The UV spectra of of **1** in a pH 2.5 aqueous solution (1 M LiCl + 0.5 M H<sub>2</sub>SO<sub>4</sub>). The UV curves were detected per 24 hours for five times.

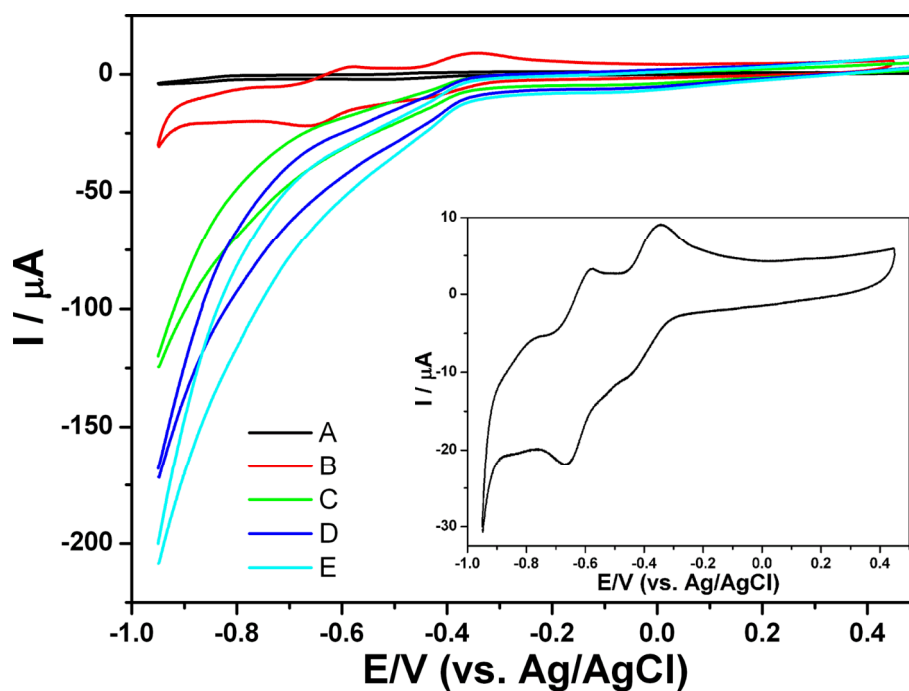

**Figure S5.** Electrocatalysis of the reduction of NO<sub>2</sub><sup>-</sup> in the presence of 10<sup>-3</sup> M **2** at the scan rate of 10 mV s<sup>-1</sup> with NO<sub>2</sub><sup>-</sup> concentrations of 0.0 (B), 2.0 (C), 3.0 (D), and 5.0 mM (E). Inner: Cyclic voltammogram of 10<sup>-3</sup> M **2** in a pH 2.5 (1 M LiCl + 0.5 M H<sub>2</sub>SO<sub>4</sub>) solution at the scan rates 10 mV s<sup>-1</sup>.

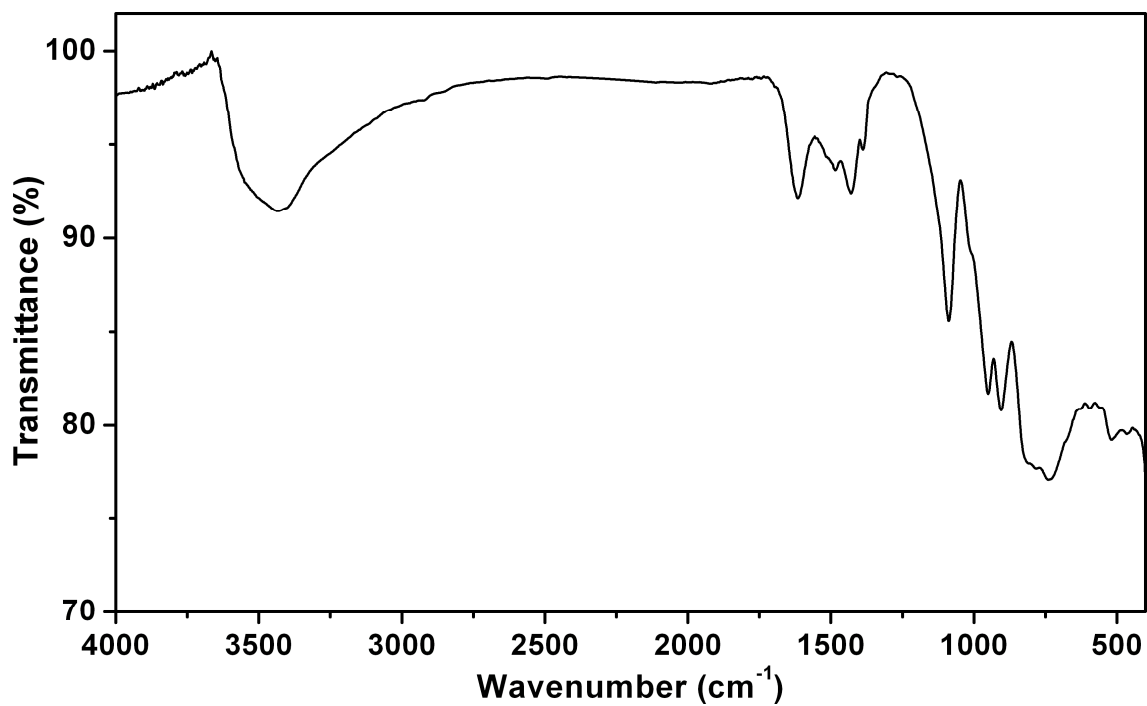

**Figure S6.** IR spectra for compound 1.

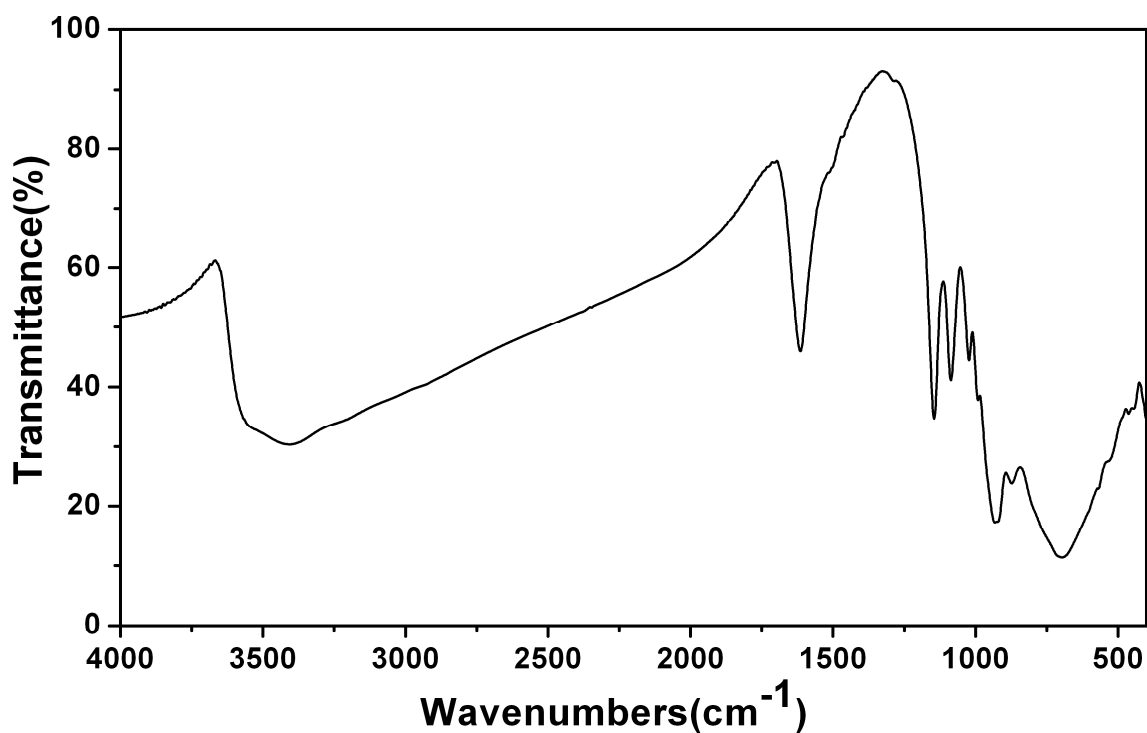

**Figure S7.** IR spectra for compounds 2.

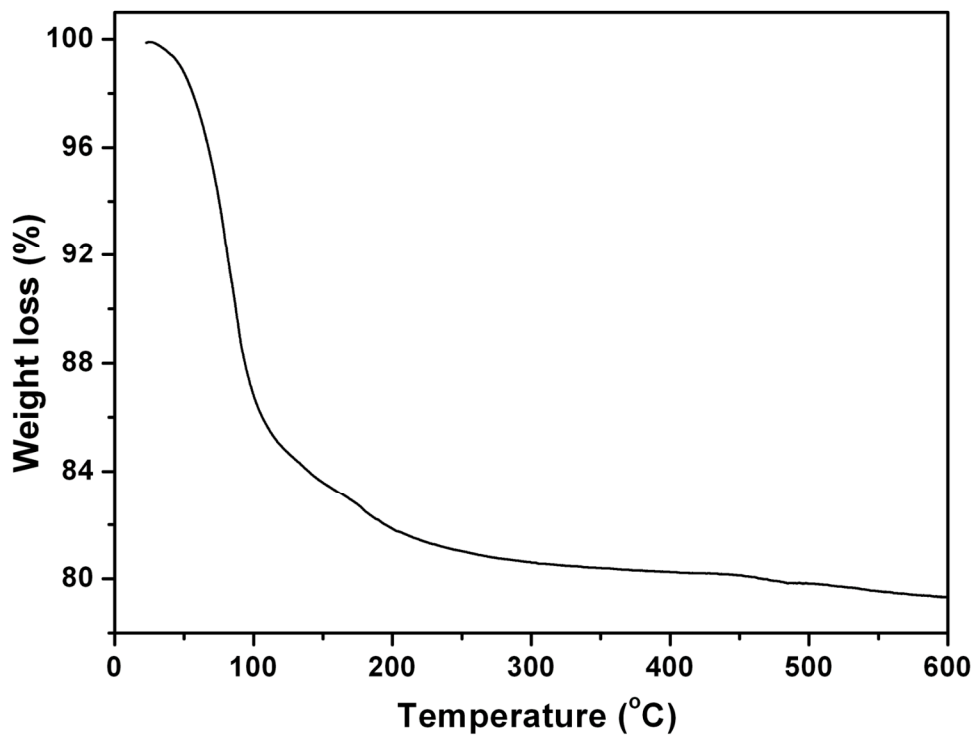

**Figure S8.**The TG curve of compound 1.

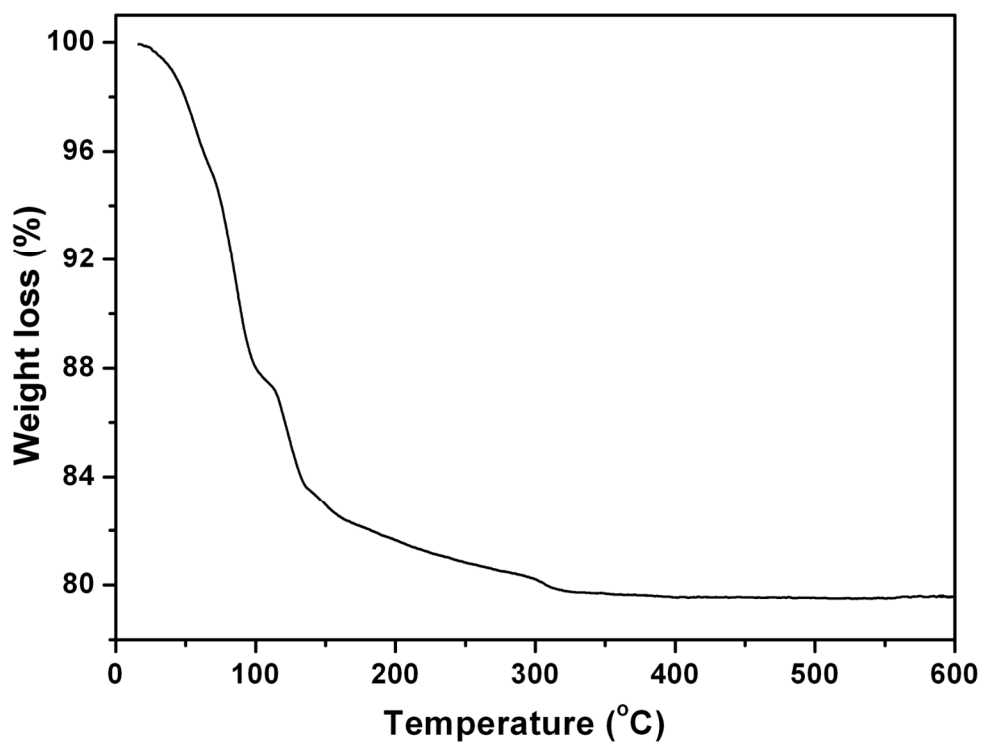

**Figure S9.**The TG curve of compound 2.
